# Supplementary material for: Lyme Disease as a Rare Trigger for Autoimmune Hemolytic Anemia
Source: Research Square preprint supplement (doi:10.21203/rs.3.rs-7647104/v1), 2025-09-25
Supplement: Supplementary file 1 [file 5c01cece372b9c1a972a8022.docx]

**Supplements**

**Supplement 1.** Diagnostic Work-up

| Parameters | Result |
| --- | --- |
| CD 59 flow cytometry of peripheral blood | negative |
| G6PD enzime activity | high |
| ADAMTS-13 activity,% | 69.39 |
| CD 59 flow cytometry ofperipheral blood | negative |
| G6PD enzime activity | high |
| ADAMTS-13 activity,% | 69.39 |
| Parvovirus B 19 / CMV/ EBV DNA PCR | all negative |
| IgG/IgA/IgM, g/L | 18.5/ 11.5/2.38 |
| serum free kappa/lambda ratio | 1.14 |
| beta-2 microglobulin mg/L | 1.66 |
| c3 / c4, g/L | 0.55 / 0.058 |
| ANA/ANCA (IIF) | all negative |
| Cryoglobulin | negative |
| Broad viral serology (including viral hepatit serology, TORCH-S) | all negative |
| alfo-fetoprotein, g/L | 10,60 |
| Antiphospholipid Antibodies, U/ml | anticardiolipin IgG 5.41  anticardiolipinIgM 5.75  anti-beta2 glycoprotein IgG 6.93  anti-beta2 glycoprotein IgM 9.10  Lupus anticougulant 0.67 R |
| Anti-DsDNA, IU/AntiDNA crithida luciliae) | 7.28 /negative |
| Factor V Leiden mutation/Protorombin gene mutation/ /MTHFR gene mutation | negative/negative/heterozigot pozitive |

Abbreviations: G6PD: Glucose-6-phosphate dehydrogenase, ADAMTS-13:a Distntegrin and Metalloproteinase with a Thrombospondin Type 1 motif, member 13, Ig G/A/M:immunoglobulin G/A/M, ANA:antinuclear antibodies, ANCA: antineutrophilic cytoplasmic antibody, CMV: cytomegalyvirus, EBV:Epstein–Barr Vırus, TORC-s: Toxoplazma, Rubella, Cytomegalovirus, Herpes Simplex Virus (HSV) Tip II and syphilis MTHFR:methylenetetrahydrofolate reductase

**Supplement 2.** Lyme Ser ology and Western Blot Results

|  | At the Diagnosis of Lyme Disease | At the Diagnosis of the Neuroborreliosis | At the 3 rd weak of dual antibiotherapy |
| --- | --- | --- | --- |
| Serum B. burgdorferi IgG serology, U/ml | 8.3 | NA | NA |
| Serum B. burgdorferi IgM serology, U/ml | 33.3 | NA | NA |
| Serum B. burgdorferi IgG Western Blot | - | NA | + |
| Serum B. burgdorferi IgM Western Blot | + | NA | _ |

Abbreviations: +: positive, -: negative, NA: non-avaliable
